# Supplementary material for: Cholecystokinin Plays a Novel Protective Role in Diabetic Kidney Through Anti-inflammatory Actions on Macrophage: Anti-inflammatory Effect of Cholecystokinin
Source: PubMed Central journal article supplement — Diabetes. 2012 Mar 14;61(4):897–907. doi: 10.2337/db11-0402 (PMC3314350; doi:10.2337/db11-0402), 2012-03-14
Supplement: supp_db11-0402_DB110402SupplementaryData.pdf [file supp_db11-0402_DB110402SupplementaryData.pdf]

## SUPPLEMENTARY DATA

### *GEO accession numbers.*

Array data were deposited at the Gene Expression Omnibus (National Center for Biotechnology Information) with accession numbers GSM527655, GSM527857, GSM528050 and GSM528051. The array data are also available in a series with accession number GSE21390.

### Supplementary Table 1. Primers and product size for genotyping of mice.

| Mouse gene   | Primers for genotyping PCR        | Product size (bp) |
|--------------|-----------------------------------|-------------------|
| <i>Cck1R</i> | 5'-AGTGAGCCATTCACCAGCTCGCCAG-3'   | Wild type = 220   |
|              | 5'-GTTGCTATATCTCCCTTACCTTGGTAG-3' | Disrupted = 285   |
|              | 5'-TGCGCAACTGTTGGGAAGGGCGATC-3'   |                   |

### Supplementary Table 2. Sequences of the Primers for real-time PCR

| Primers      | Forward primer (5'-3')    | Reverse primer (5'-3')    |
|--------------|---------------------------|---------------------------|
| Mouse genes  |                           |                           |
| <i>Cck</i>   | CGCGATACATCCAGCAGGTC      | AAATCCATCCAGCCCATGTAGTC   |
| <i>Cck1R</i> | TGTTGCCCGAATCCTGGTC       | GGTGCTCATGTGGCTGTAGGAA    |
| <i>Cck2R</i> | TGACAAGGGCTGATTGGCTTC     | AGGCAATGATGAGGTCAAAGTGG   |
| <i>Cd68</i>  | CATCAGAGCCCGAGTACAGTCTACC | AATTCTGCGCCATGAATGTCC     |
| <i>Ccl2</i>  | GCATCCACGTGTTGGCTCA       | CTCCAGCCTACTCATTGGGATCA   |
| <i>Icam1</i> | CAATTCACACTGAATGCCAGCTC   | CAAGCAGTCCGTCTCGTCCA      |
| <i>Actb</i>  | CATCCGTAAAGACCTCTATGCCAAC | ATGGAGCCACCGATCCACA       |
| <i>Kim1</i>  | CCTTGTGAGCACCGTGGCTA      | TGTTGTCTTCAGCTCGGGAATG    |
| Rat genes    |                           |                           |
| <i>Cd68</i>  | TGTACCTGACCCAGGGTGGAA     | GAATCCAAAGGTAAGCTGTCCGTAA |
| <i>Ccl2</i>  | CTATGCAGGTCTCTGTCACGCTTC  | CAGCCGACTCATTGGGATCA      |
| <i>Icam1</i> | ACAAGTGCCGTGCCTTTAGCTC    | GATCACGAAGCCCGCAATG       |
| <i>Tgfb1</i> | TGCGCCTGCAGAGATTCAAG      | AGGTAACGCCAGGAATTGTTGCTA  |
| <i>Tnf</i>   | AACTCGAGTGACAAGCCCGTAG    | GTACCACCAGTTGGTTGTCTTTGA  |
| <i>Actb</i>  | GGAGATTACTGCCCTGGCTCCTA   | GACTCATCGTACTCCTGCTTGCTG  |
| <i>Kim1</i>  | CAAGGCCCACTAATTTCACAAG    | TCTGTACCTCAGCAGTTGTCTCA   |
| <i>Nphs1</i> | TGATTGGCGGCTAGGACTTAGG    | TAAGCATGCACACATCGCACA     |
| Human genes  |                           |                           |
| <i>TNF</i>   | GACAAGCCTGTAGCCCATGTTGTA  | CAGCCTTGGCCCTTGAAGA       |
| <i>ACTB</i>  | TGGCACCCAGCACAAATGAA      | CTAAGTCATAGTCCGCCTAGAAGCA |

SUPPLEMENTARY DATA

**Supplementary Table 3.** Metabolic characteristics of BMT mice (4 weeks after induction of diabetes)

|                                               | <b>WT→WT</b> | <b>WT→1R<sup>-/-</sup></b> | <b>1R<sup>-/-</sup>→WT</b> |
|-----------------------------------------------|--------------|----------------------------|----------------------------|
| <i>n</i>                                      | 4            | 6                          | 6                          |
| SBP, mmHg                                     | 100.5 ± 2.1  | 94.5 ± 1.8                 | 97.7 ± 1.3                 |
| BW, g                                         | 22.5 ± 0.3   | 21.6 ± 0.5                 | 22.7 ± 0.4                 |
| Kidney weight, mg/g BW                        | 12.4 ± 0.3   | 11.3 ± 0.6                 | 13.3 ± 0.6*                |
| A1c, %                                        | 5.2 ± 0.2    | 5.2 ± 0.3                  | 5.4 ± 0.5                  |
| WBC count, x10 <sup>3</sup> /μl               | 5.7 ± 1.2    | 4.0 ± 0.4                  | 5.2 ± 0.6                  |
| Cr, mg/dl                                     | 0.14 ± 0.01  | 0.13 ± 0.01                | 0.13 ± 0.01                |
| Ccr, ml·min <sup>-1</sup> ·g BW <sup>-1</sup> | 6.7 ± 2.1    | 7.8 ± 1.8                  | 9.4 ± 1.1                  |

WT→WT, WT mice that received a bone marrow transplant from WT mice; WT→1R<sup>-/-</sup>, CCK-1 receptor deficient mice that received a bone marrow transplant from WT mice; 1R<sup>-/-</sup>→WT, WT mice that received a bone marrow transplant from CCK-1 receptor deficient mice; A1c, hemoglobin A1c; WBC; white blood cell, Cr, creatinine; Ccr, creatinine clearance. Values are the means ± SEM. \*, *P* < 0.05 vs. other groups.
